# Supplementary material for: Smartphone-based sensing and in vivo and in vitro imaging of Mn(vii) based on nitrogen-doped red fluorescent carbon dots
Source: Royal Society of Chemistry journal article supplement (doi:10.1039/d4ay00783b), 2024-01-01
Supplement: d4ay00783b1.pdf [file d4ay00783b1.pdf]

1

## Supplementary Materials for:

2

3 **Smartphone sensing of Mn(VII) and in vivo and in vitro imaging**

4 **based on nitrogen-doped red fluorescent carbon dots**

5

6 Xiaofeng Li<sup>a</sup>, Liru Yan<sup>b</sup>, Jianyang Feng<sup>b</sup>, Lihong Shi<sup>b,\*</sup>

7

8 <sup>a</sup>Taiyuan University, Taiyuan, Shanxi 030012, PR China

9 <sup>b</sup>College of Chemistry and Chemical Engineering, Shanxi University, Taiyuan 030006,

10 PR China

11

12

13 \*Corresponding author. E-mail address: shilihong@sxu.edu.cn

14

15

1

### ***Materials***

2        Passion fruit was purchased from a local supermarket (Shanxi, China). Neutral  
3 red was gained from Shanghai Aladdin Reagent Co., Ltd. (Shanghai, China). PbCl<sub>2</sub>,  
4 CdCl<sub>2</sub>, MnCl<sub>2</sub>, NiCl<sub>2</sub>, CuCl<sub>2</sub>, CaCl<sub>2</sub>, CrCl<sub>3</sub>, CoCl<sub>2</sub>, AlCl<sub>3</sub>, MgCl<sub>2</sub>, FeCl<sub>3</sub>, BaCl<sub>2</sub>, BiCl<sub>3</sub>,  
5 ZnCl<sub>2</sub>, AgNO<sub>3</sub>, KI, KF, KMnO<sub>4</sub>, Na<sub>2</sub>CrO<sub>4</sub>, Na<sub>3</sub>PO<sub>4</sub>, Na<sub>2</sub>S<sub>2</sub>O<sub>3</sub>, Na<sub>2</sub>S, KSCN, Na<sub>2</sub>SO<sub>4</sub>,  
6 NaCl, Na<sub>2</sub>CO<sub>3</sub>, NaNO<sub>3</sub>, NaBr, Na<sub>2</sub>SO<sub>3</sub>, NaNO<sub>2</sub>, alanine, arginine, aspartic acid,  
7 cysteine, glutamic acid, leucine, lysine, methionine, phenylalanine, proline, threonine,  
8 tyrosine and valine were purchased from Beijing Chemical Corp (Beijing, China).

9

### ***Apparatus***

10        Transmission electron microscopy (TEM) study was carried out in a JEOL JEM-  
11 2100 instrument operating at an accelerating voltage of 200 KV. Samples for TEM  
12 measurements were obtained by placing a drop of colloidal solution on a carbon-  
13 coated copper grid and then drying at room temperature. Atomic force microscope  
14 (AFM) images were obtained by using an AFM Bruker MultiMode 8 in the contact  
15 mode. UV-vis absorption spectra were recorded through HITACHI U-2910 UV.  
16 Fluorescent (FL) spectra were operated with a Hitachi F-4500 fluorescence  
17 spectrophotometer (Tokyo, Japan). Fourier transform infrared (FTIR) spectrum was  
18 recorded on a Bruker tensor 2 spectrometer using a resolution of 4 cm<sup>-1</sup>. The sample  
19 with 1 mg diluted with KBr (ratio 1:200) was pressed into the discs. X-ray  
20 photoelectron spectrometer (XPS) data were obtained with an AXIS ULTRA DLD  
21 electron spectrometer from Shimadzu Company using 300W Al K $\alpha$  radiation. The FL  
22 lifetime was measured by using an Edinburgh FLS920. Nanosecond FL lifetime  
23 experiments were performed using a FLS 920 time-correlated single-photon counting  
24 (TCSPC) system under right-angle sample geometry. The FL lifetime was measured  
25 using an Edinburgh FLS 920. All FL images were collected with Zeiss LSM880  
26 confocal laser-scanning microscope.

27

### ***Fluorescence QY measurements***

28        The relative fluorescence quantum yield ( $\Phi$ ) of R-CDs was calculated using the  
29 equation of  $\Phi_x = \Phi_{std} I_x A_{std} \eta_x^2 / (I_{std} A_x \eta_{std}^2)$ . In the equation,  $I_x$  and  $I_{std}$  are FL intensities  
30 of R-CDs and the reference, respectively.  $A_x$  and  $A_{std}$  denote the optical densities of R-

1 CDs and the reference, respectively.  $\eta_x$  and  $\eta_{std}$  represent the refractive indices of R-  
2 CDs and reference, respectively. The absorbances of all samples in a 1.0 cm cuvette  
3 were kept under 0.050 at excitation wavelength to minimize re-absorption effects.

#### 4 *Cell viability assay*

5 For cell cytotoxicity test, HeLa cells were first plated on a Costar 96-well tissue-  
6 culture cluster and cultured at 37°C with 5% CO<sub>2</sub> in air for 3 h to adhere cells onto the  
7 surface. The well without cells and treatment with R-CDs was taken as a zero set. The  
8 medium was then changed with 100 µL of fresh DMEM supplemented with 10% FBS  
9 containing R-CDs, and cells were allowed to grow for another 24 h. At least five  
10 parallel samples were performed in each group. Cells without treatment with R-CDs  
11 were taken as a control. After adding 20 µL of 5.0 mg mL<sup>-1</sup> MTT reagent into  
12 individual well, the cells were further incubated for 4 h, followed by removing the  
13 culture medium with MTT, and then 150 µL of DMSO was added. The resulting  
14 mixture was shaken for 10 min at room temperature. The OD of the mixture was  
15 measured at 490 nm with a SunRisemicroplate reader (Tecan Austria GmbH, Grödig,  
16 Austria). The cell viability was estimated using the equation of Cell Viability (%) =  
17  $(OD_{Treated}/OD_{Control}) \times 100\%$ , where  $OD_{Control}$  and  $OD_{Treated}$  were obtained in absence  
18 and presence of R-CDs, respectively.

19

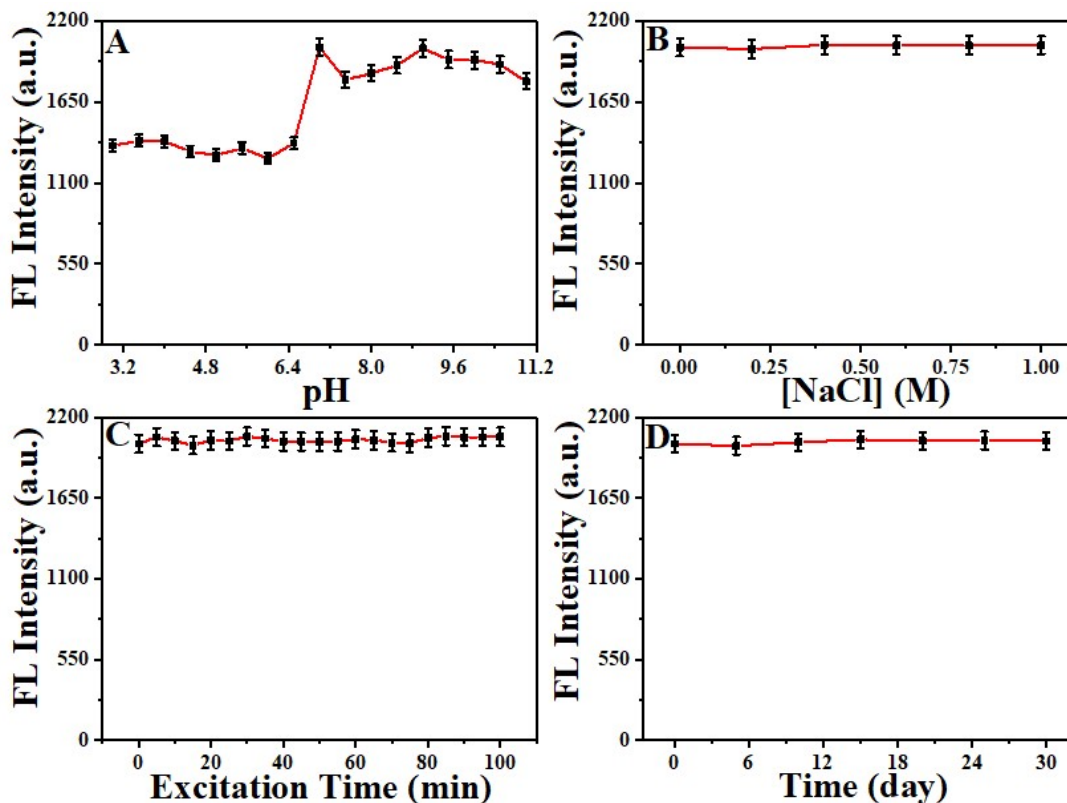

1

2 **Figure S1** (A) Effect of pH on FL intensity of R-CDs. (B) Effect of NaCl  
 3 concentration on FL intensity of R-CDs. (C) Effect of excitation time on FL intensity  
 4 of R-CDs. (D) Effect of storage time on the FL intensity of R-CDs.

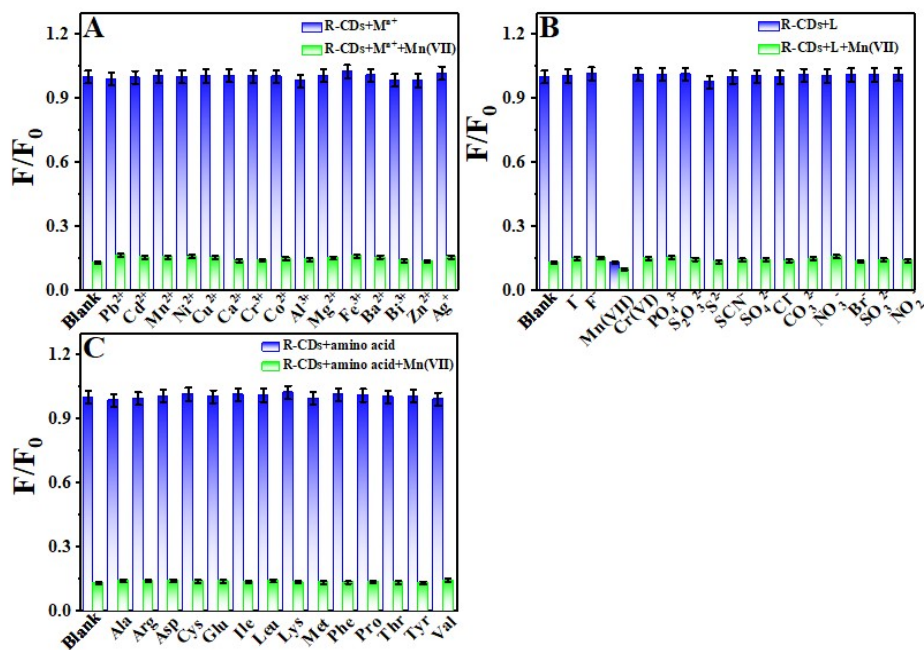

5

6 **Figure S2** Selectivity of R-CDs for Mn(VII) against different metal ions, anions and

1 amino acids (500  $\mu$ M) under pH 7.0.

2

3

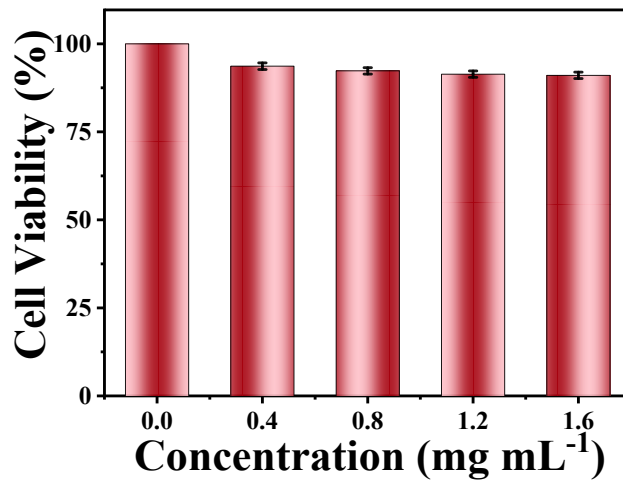

4

5 **Figure S3** Cytotoxicity test of R-CDs on HeLa cells.

6

7

8

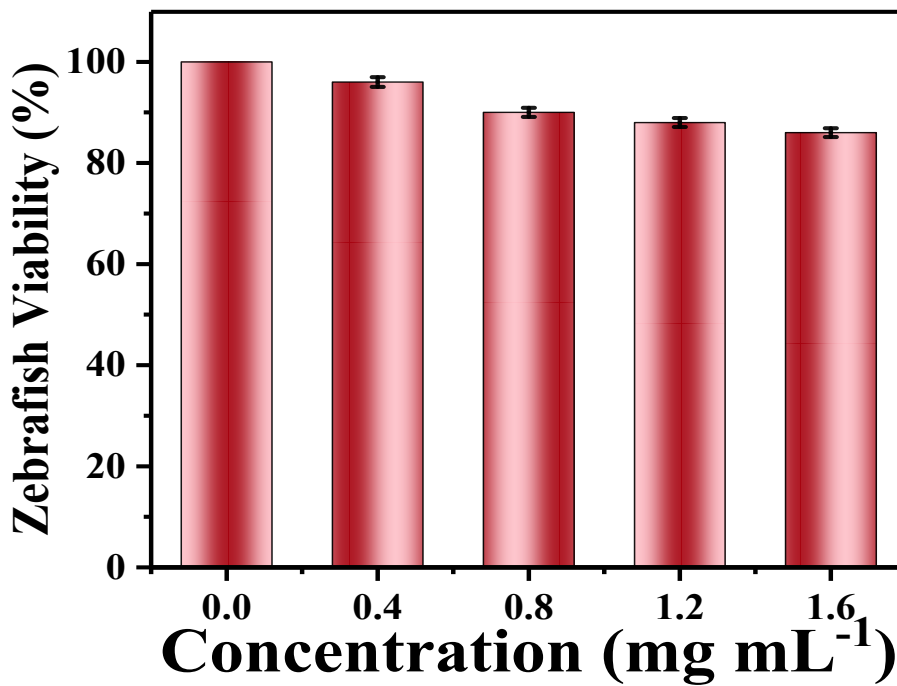

9

10 **Figure S4** Cytotoxicity test of R-CDs on zebrafish larvae.

1

2 **Table S1.** Comparison of different FL probes for Mn(VII) detection.

| Fluorescence probes | Precursor                                                            | Linear range ( $\mu\text{M}$ ) | LOD (nM) | Ref.      |
|---------------------|----------------------------------------------------------------------|--------------------------------|----------|-----------|
| NCDs                | Threonine and guanidine hydrochloride                                | 5–35                           | 660      | [1]       |
| NCDs                | Citric acid, p-hydroxybenzoic acid and ammonia                       | 0.51–2                         | 170      | [2]       |
| N,S,P-CQDs          | Saccharomyces cerevisiae                                             | 0.05–20                        | 50       | [3]       |
| N,P-CDs             | Phthalic acid, 1,2-ethylenediamine, and concentrated phosphoric acid | 10–200                         | 48.3     | [4]       |
| N,Al-CDs            | Durian shell, urea and aluminum nitrate                              | 0–100                          | 46.8     | [5]       |
| S,Cl,N-CQDs         | 1,2-ethylenediamine, glucose and sulfuric acid                       | 0.05–110                       | 12.8     | [6]       |
| R-CDs               | Passion fruit and neutral red                                        | 20–500                         | 10.42    | This work |

3

## 1 **References**

- 2 1 A. Mohammed, Y. Gugulothu, R. Bandi, R. Dadigala and U.K. Utkoor, *J. Chin.*  
3 *Chem. Soc-taip*, 2021, **68**, 1514–1521.
- 4 2 V.M. Naik, D.B. Gunjal, A.H. Gore, P.V. Anbhule, D. Sohn, S.V. Bhosale and G.B.  
5 Kolekar, *Anal. Bioanal. Chem.*, 2020, **412**, 2993–3003.
- 6 3 X. Gong, Z. Li, Q. Hu, R. Zhou, S. Shuang and C. Dong, *ACS Appl. Mater.*  
7 *Interfaces*, 2017, **9**, 38761–38772.
- 8 4 F. Du, G. Li, X. Gong, Z. Guo, S. Shuang, M. Xian and C. Dong, *Sens. Actuators B*  
9 *Chem.*, 2018, **277**, 492–501.
- 10 5 S. Jayaweera, K. Yin, X. Hu and W. J. Ng, *J. Fluoresc.*, 2019, **29**, 1291–1300.
- 11 6 Q. Hu, L. Liu, H. Sun, J. Han, X. Gong, L. Liu and Z. Yang, *J. Food Compos. Anal.*,  
12 2020, **88**, 103447–103455.
